# Supplementary material for: Effects of magnesium hydroxide morphology on Pb(ii) removal from aqueous solutions
Source: Royal Society of Chemistry journal article supplement (doi:10.1039/d3ra08040d), 2024-01-01
Supplement: d3ra08040d1.pdf [file d3ra08040d1.pdf]

## Supporting Information

### Effects of magnesium hydroxide morphology on Pb(II) removal from aqueous solutions

Donghai Zhu<sup>#,\*</sup>, Jiachen Zhu<sup>#</sup>, Ping Li, Shengjie Lan<sup>\*</sup>

State Key Laboratory of Plateau Ecology and Agriculture, School of Chemical Engineering, Qinghai University, Xining 810016, PR China

\* Corresponding authors.

E-mail address: zhudonghai-2001@163.com (D. Zhu), lanshengjie@126.com (S. Lan).

<sup>#</sup> Donghai Zhu and Jiachen Zhu contributed equally to this work.

## Adsorption experiments

The Pb(II) ion removal efficiency ( $E\%$ ) and the adsorption capacity ( $q_t$ ) of MH were calculated using Eqs. (1) and (2), respectively.

$$E = \frac{(C_0 - C_t)}{C_0} \times 100\% \quad (1)$$

$$q_t = \frac{(C_0 - C_t)V}{m} \quad (2)$$

where  $C_0$  (mg/L) represents the initial Pb(II) ion concentration,  $C_t$  (mg/L) denotes the concentration in solution at a given time  $t$ ,  $V$  (L) is the volume of the Pb(II) ion solution, and  $m$  (g) signifies the weight of MH added.

To further investigate adsorption kinetics, the experimental data were fitted with the pseudo-first-order and pseudo-second-order kinetic models, as expressed below:

$$\ln(q_e - q_t) = \ln q_e - k_1 t \quad (3)$$

$$\frac{t}{q_t} = \frac{1}{k_2 \cdot q_e^2} + \frac{1}{q_e} t \quad (4)$$

where  $q_t$  ( $\text{mg}\cdot\text{g}^{-1}$ ) and  $q_e$  ( $\text{mg}\cdot\text{g}^{-1}$ ) represent the adsorption amount of Pb(II) by MH at time  $t$  (min) and equilibrium, respectively.  $K_1$  ( $\text{min}^{-1}$ ) and  $K_2$  ( $\text{g}\cdot\text{mg}^{-1}\cdot\text{min}^{-1}$ ) denote the equilibrium rate constants in the pseudo-first-order and pseudo-second-order kinetic models, respectively.

The adsorption isotherms of Pb(II) on both FGMH and HPMH were evaluated using the Langmuir model (Eq. (5)) and the Freundlich model (Eq. (6)).

$$\frac{c_e}{q_e} = \frac{c_e}{q_m} + \frac{1}{q_m k_L} \quad (5)$$

$$\ln q_e = \ln k_F + \frac{1}{n} \ln c_e \quad (6)$$

where  $C_e$  ( $\text{mg}\cdot\text{L}^{-1}$ ) signifies the equilibrium concentration of Pb(II),  $q_m$  ( $\text{mg}\cdot\text{g}^{-1}$ ) denotes the calculated maximum adsorption capacity of MH, and  $q_e$  ( $\text{mg}\cdot\text{g}^{-1}$ ) represents the adsorption capacity of MH measured experimentally at equilibrium.  $K_L$  ( $\text{L}\cdot\text{mg}^{-1}$ ) and  $K_F$  ( $\text{mg}\cdot\text{g}^{-1}$ ) correspond to the Langmuir constant and Freundlich constant, respectively. The Freundlich exponent 'n' reflects the adsorption strength.

### Acid dissolution-electrolysis experiments

In the acid dissolution-electrolysis experiments, 30 mg of the solid product containing adsorbed lead by FGMH was dissolved in dilute nitric acid. Subsequently, the solution was diluted to a final volume of 50 mL using deionized water, and its pH was adjusted to approximately 5.0. This solution served as the electrolyte, and a polytetrafluoroethylene electrolytic cell was employed as the reactor. A stainless steel electrode ( $1 \times 2$  cm) was utilized as the cathode, while a ruthenium-coated titanium sheet electrode ( $1 \times 2$  cm) was employed as the anode. The electrolysis experiment was conducted with a fixed electrode spacing of 20 mm and a constant voltage of 4 V.

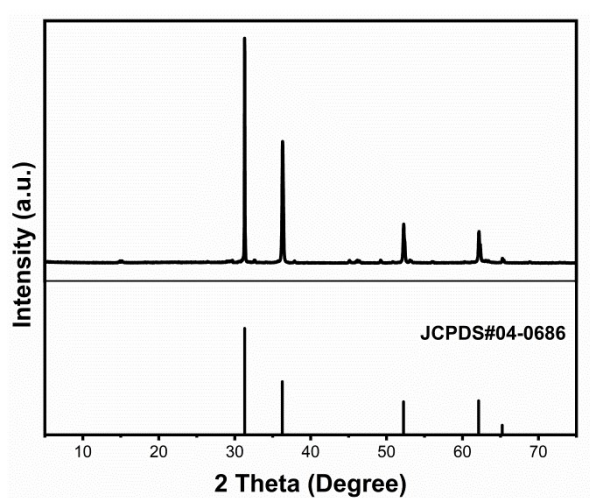

Fig. S1. XRD patterns of the obtained metallic Pb recycled from adsorbed product.
